# Supplementary material
Source: PubMed Central journal article supplement (PMC3347426)
Supplement: supp_80.5.1662_IAI-IAI00057-12-s01.pdf [file supp_80.5.1662_IAI-IAI00057-12-s01.pdf]

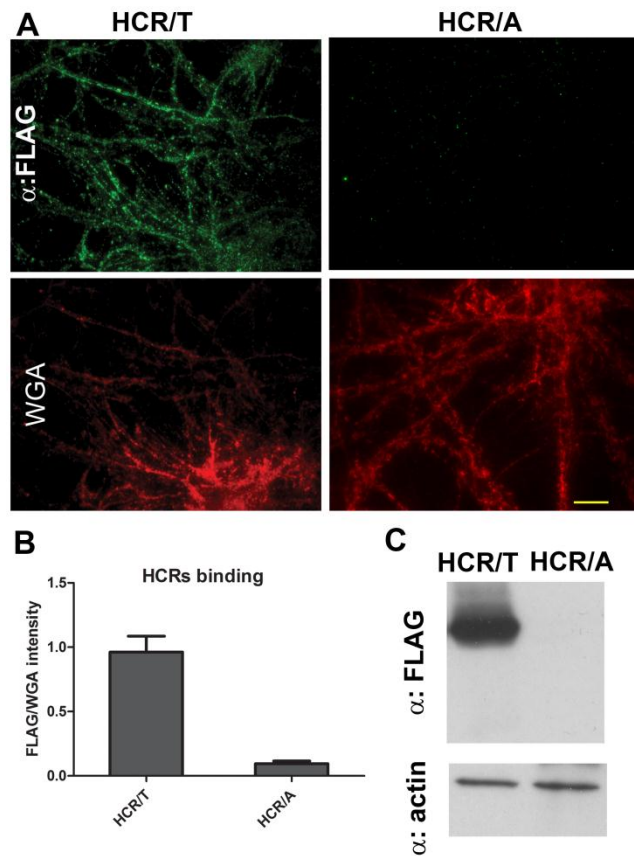

**Supplementary Figure 1. HCR/T and HCR/A binding to neurons.** 40 nM FLAG-HCR/T and FLAG-HCR/A were incubated with rat cortical neurons in low K buffer at 4°C for 60 min. Cells were washed, fixed and incubated with Alexa594-conjugated wheat germ agglutinin (WGA) for 15 min. Cells were then washed and fixed again. HCR bound to neurons was detected by immunofluorescence (IF) using mouse- $\alpha$ -FLAG antibody followed by alexa488-secondary antibody. **(A)** 40 nM FLAG-HCR/T and FLAG-HCR/A bound to rat cortical neurons under indicated binding buffer. Scale bar is 10  $\mu$ m. **(B)** Quantified binding of FLAG-HCR/T and FLAG-HCR/A to rat cortical neurons using the intensity ratio between  $\alpha$ -FLAG antibody and WGA staining. **(C)** Cell lysates were also collected and subjected to SDS-PAGE. Proteins were transferred to PVDF membranes and subjected to Western blotting, using  $\alpha$ -3x-FLAG antibody (HCR) and  $\alpha$ -actin antibody. The Western blot is shown.

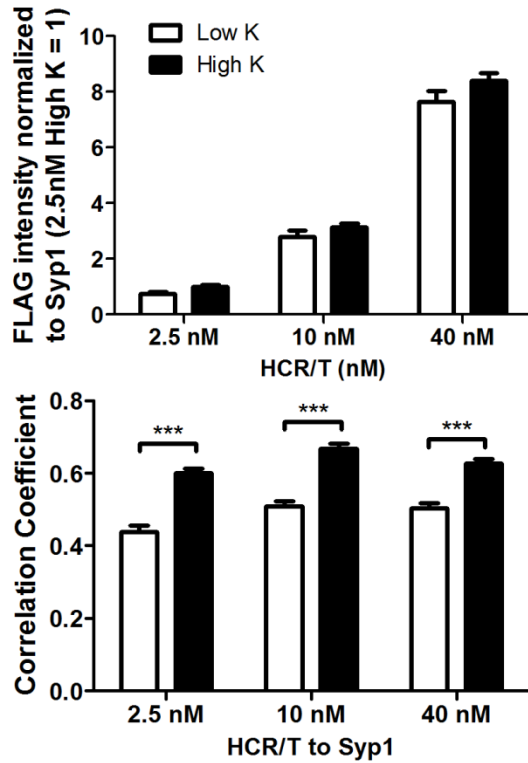

**Supplementary Figure 2. Dose-dependent association of HCR/T to neurons.** 2.5, 10 or 40 nM FLAG-HCR/T was incubated with rat cortical neurons in low K buffer or high K buffer for 5 min at 37°C. Neurons were fixed and stained with  $\alpha$ -FLAG and  $\alpha$ -Syp. FLAG intensity was normalized to Syp1 signal (upper panel). Correlation coefficients (lower panel) were determined using ImageJ as described in methods. HCR/T/ $\alpha$ -syp ratios in low K buffer or high K buffer were not statistically different at the assayed concentrations.
